# Supplementary material
Source: PubMed Central journal article supplement (PMC7497723)
Supplement: cg9b01732_si_001.pdf [file cg9b01732_si_001.pdf]

# Pressure-Promoted Solvation of Resorcinol

*Fatemeh Safari, Anna Olejniczak, Andrzej Katrusiak\**

Faculty of Chemistry, Adam Mickiewicz University, ul. Uniwersytetu Poznańskiego 8, 61-614

Poznań, Poland

## Supporting Information

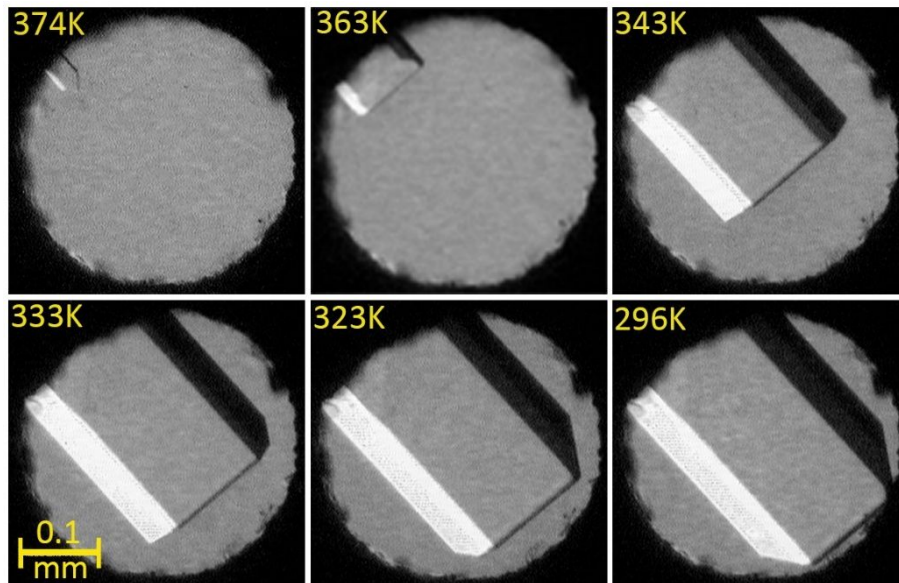

**Figure S1.** Single crystals of monohydrate of orcinol grown isochorically in the diamond-anvil cell at 0.2 GPa from its solution in the methanol.

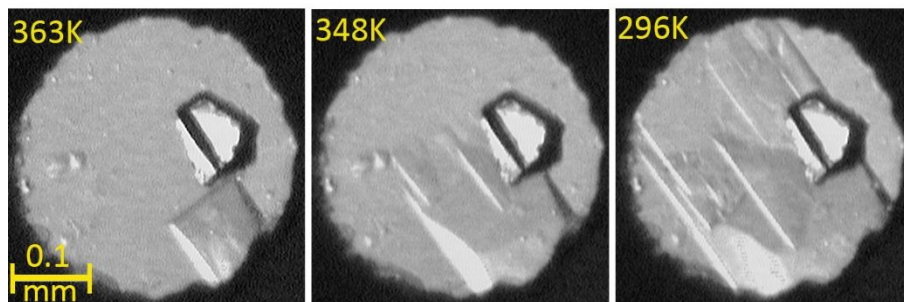

**Figure S2.** Isochoric growth of a single crystal of orcinol monohydrate 0.2 GPa from its water solution. The ruby chip for pressure calibration lies at the right side of the DAC chamber.

**Table S1.** Selected experimental data for co-crystals of resorcinol.

| C <sub>6</sub> H <sub>6</sub> O <sub>2</sub>                             | C <sub>6</sub> H <sub>4</sub> (OH) <sub>2</sub> ·H <sub>2</sub> O | 3C <sub>6</sub> H <sub>4</sub> (OH) <sub>2</sub> ·2H <sub>2</sub> O |                      |            | C <sub>6</sub> H <sub>4</sub> (OH) <sub>2</sub> ·CH <sub>3</sub> OH |           |
|--------------------------------------------------------------------------|-------------------------------------------------------------------|---------------------------------------------------------------------|----------------------|------------|---------------------------------------------------------------------|-----------|
| Pressure (GPa)                                                           | 0.8 (2)                                                           | 0.55 (2)                                                            | 0.83 (2)             | 0.93 (2)   | 0.49 (2)                                                            | 0.7 (2)   |
| Temperature (K)                                                          | 296(2)                                                            |                                                                     | 296 (2)              |            | 296 (2)                                                             |           |
| Formula weight                                                           | 128.12                                                            |                                                                     | 199                  |            | 142.15                                                              |           |
| Crystal color                                                            | colorless                                                         |                                                                     | Colorless            |            | colorless                                                           |           |
| Crystal size (mm)                                                        | 0.25×0.2×0.15                                                     |                                                                     | 0.25×0.2×0.12        |            | 0.25×0.2×0.1                                                        |           |
| Crystal system                                                           | Orthorhombic                                                      |                                                                     | Monoclinic           |            | Orthorhombic                                                        |           |
| Space group                                                              | <i>P</i> 2 <sub>1</sub> 2 <sub>1</sub> 2 <sub>1</sub>             |                                                                     | <i>C</i> 2/ <i>c</i> |            | <i>P</i> 2 <sub>1</sub> 2 <sub>1</sub> 2 <sub>1</sub>               |           |
| Unit cell (Å) <i>a</i>                                                   | 5.6567(18)                                                        | 8.1180(14)                                                          | 8.041(3)             | 8.0312(8)  | 6.0242(12)                                                          | 5.9240(3) |
| <i>b</i>                                                                 | 7.6544(5)                                                         | 8.1403(18)                                                          | 8.110(3)             | 8.1080(6)  | 8.1523(12)                                                          | 8.1201(3) |
| <i>c</i>                                                                 | 13.226(3)                                                         | 26.192(4)                                                           | 26.029(8)            | 26.01(4)   | 14.32(3)                                                            | 14.087(9) |
| $\beta$ (°)                                                              | 90                                                                | 95.915 (17)                                                         | 95.67 (3)            | 95.31 (3)  | 90                                                                  | 90        |
| Volume (Å <sup>3</sup> )                                                 | 572.7(2)                                                          | 1721.6(6)                                                           | 1689.1(10)           | 1686(2)    | 703.4(14)                                                           | 677.6(4)  |
| <i>Z</i>                                                                 | 4                                                                 | 12                                                                  | 12                   | 12         | 4                                                                   | 4         |
| Density (g/cm <sup>3</sup> )                                             | 1.486                                                             | 1.4.6                                                               | 1.433                | 1.435      | 1.342                                                               | 1.393     |
| Wavelength MoK $\alpha$ (Å)                                              | 0.71073                                                           | 0.71073                                                             | 0.71073              |            | 0.71073                                                             | 0.71073   |
| Absorption (mm <sup>-1</sup> )                                           | 0.120                                                             | 0.111                                                               | 0.114                | 0.114      | 0.105                                                               | 0.109     |
| F(000)                                                                   | 272                                                               | 768                                                                 | 768                  | 768        | 304                                                                 | 304       |
| 2 $\theta$ max (deg.)                                                    | 53.146                                                            | 54.34                                                               | 55.006               | 54.362     | 56.656                                                              | 57.308    |
| Index ranges <i>h</i> <sub>min</sub> / <i>h</i> <sub>max</sub>           | -3/3                                                              | -8/8                                                                | -8/8                 | -10/9      | -8/7                                                                | -7/7      |
| <i>k</i> <sub>min</sub> / <i>k</i> <sub>max</sub>                        | -9/9                                                              | -7/7                                                                | -8/8                 | -9/10      | -10/10                                                              | -10/10    |
| <i>l</i> <sub>min</sub> / <i>l</i> <sub>max</sub>                        | -15/14                                                            | -27/27                                                              | -26/26               | -8/8       | -4/4                                                                | -4/4      |
| Refl. Collected                                                          | 2295                                                              | 3075                                                                | 2597                 | 4286       | 3847                                                                | 3806      |
| Refl. observed ( <i>I</i> >4 $\sigma$ <sub><i>I</i></sub> )              | 430                                                               | 541                                                                 | 522                  | 435        | 536                                                                 | 523       |
| <i>R</i> (int)                                                           | 0.0349                                                            | 0.1228                                                              | 0.2309               | 0.0459     | 0.0548                                                              | 0.0616    |
| Data/restraints/parameters                                               | 430/0/87                                                          | 541/25/133                                                          | 522/6/134            | 435/30/135 | 536/0/95                                                            | 523/0/95  |
| Goodness-of-fit on F <sup>2</sup>                                        | 1.150                                                             | 1.017                                                               | 0.988                | 1.129      | 1.217                                                               | 1.100     |
| Final <i>R</i> <sub>1</sub> ( <i>I</i> >2 $\sigma$ <sub><i>I</i></sub> ) | 0.0371/                                                           | 0.0751/                                                             | 0.1014/              | 0.0506/    | 0.0440/                                                             | 0.0351/   |
|                                                                          | 0.0871                                                            | 0.1887                                                              | 0.2441               | 0.1248     | 0.0800                                                              | 0.0793    |
| <i>R</i> <sub>1</sub> / <i>wR</i> <sub>2</sub> (all data)                | 0.0571/                                                           | 0.1346/                                                             | 0.2222/              | 0.0808/    | 0.0909/                                                             | 0.0408/   |
|                                                                          | 0.1138                                                            | 0.2432                                                              | 0.3311               | 0.1488     | 0.0932                                                              | 0.0819    |
| Absorption corrections                                                   |                                                                   | DAC, gasket and sample crystal                                      |                      |            |                                                                     |           |

**Table S2.** Selected experimental data for monohydrate of orcinol.

| C <sub>6</sub> H <sub>6</sub> O <sub>2</sub>                             | C <sub>7</sub> H <sub>6</sub> (OH) <sub>2</sub> .H <sub>2</sub> O |               |
|--------------------------------------------------------------------------|-------------------------------------------------------------------|---------------|
| Pressure (GPa)                                                           | 0.2(2)                                                            |               |
| Temperature (K)                                                          | 296(2)                                                            |               |
| Formula weight                                                           | 142.15                                                            |               |
| Crystal color                                                            | Colorless                                                         |               |
| Crystal size (mm)                                                        | 0.25×0.2×0.15                                                     | 0.25×0.2×0.12 |
| Crystal system                                                           | Monoclinic                                                        |               |
| Space group                                                              | <i>P2<sub>1</sub>/c</i>                                           |               |
| Unit cell (Å) <i>a</i>                                                   | 9.74(4)                                                           | 9.622.(10)    |
| <i>b</i>                                                                 | 8.0023(16)                                                        | 7.8957(9)     |
| <i>c</i>                                                                 | 9.308(3)                                                          | 9.184(5)      |
| $\beta$ (°)                                                              | 96.35 (9)                                                         | 97.59 (8)     |
| Volume (Å <sup>3</sup> )                                                 | 721(3)                                                            | 691.6(8)      |
| <i>Z</i>                                                                 | 4                                                                 | 4             |
| Density (g/cm <sup>3</sup> )                                             | 1.309                                                             | 1.365         |
| Wavelength MoK $\alpha$ (Å)                                              | 0.71073                                                           | 0.71073       |
| Absorption (mm <sup>-1</sup> )                                           | 0.102                                                             | 0.107         |
| F(000)                                                                   | 304                                                               | 304           |
| 2 $\theta$ max (deg.)                                                    | 54.618                                                            | 52.896        |
| Index ranges <i>h</i> <sub>min</sub> / <i>h</i> <sub>max</sub>           | -2/2                                                              | -7/7          |
| <i>k</i> <sub>min</sub> / <i>k</i> <sub>max</sub>                        | -10/10                                                            | -9/9          |
| <i>l</i> <sub>min</sub> / <i>l</i> <sub>max</sub>                        | -11/11                                                            | -8/8          |
| Refl. Collected                                                          | 2939                                                              | 2509          |
| Refl. observed ( <i>I</i> >4 $\sigma$ <sub><i>I</i></sub> )              | 286                                                               | 354           |
| <i>R</i> (int)                                                           | 0.1550                                                            | 0.0459        |
| Data/restraints/parameters                                               | 286/24/91                                                         | 354/33/97     |
| Goodness-of-fit on F <sup>2</sup>                                        | 1.018                                                             | 1.137         |
| Final <i>R</i> <sub>1</sub> ( <i>I</i> >2 $\sigma$ <sub><i>I</i></sub> ) | 0.0574/                                                           | 0.0371/       |
|                                                                          | 0.1308                                                            | 0.0423        |
| <i>R</i> <sub>1</sub> / <i>wR</i> <sub>2</sub> (all data)                | 0.1454/                                                           | 0.0899/       |
|                                                                          | 0.1927                                                            | 0.0528        |
| Absorption corrections                                                   | DAC, gasket and sample crystal                                    |               |

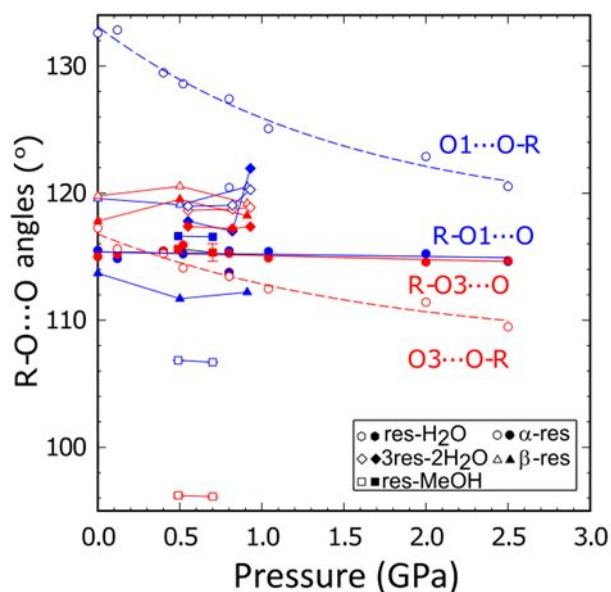

**Figure S3.** Pressure dependence of hydrogen-bond angles R-O...O on the H-donor side (full symbols and full lines) and on the H-acceptor side (open symbols and dashed lines).

**Table S3.** Geometry of O...O contacts in  $\beta$ -resorcinol.

| Pressure (GPa)          | 0.0001(2) | 0.50(2)    | 0.91(2)   |
|-------------------------|-----------|------------|-----------|
| Distances[Å]            |           |            |           |
| O-H...O <sup>3655</sup> | 2.709 (2) | 2.6620(14) | 2.640 (4) |
| O-H...O <sup>2665</sup> | 2.780 (3) | 2.749 (13) | 2.721 (4) |

**Table S4.** Geometry of O...O contacts in  $\alpha$ -resorcinol at 0.0001-2.5(2) GPa range.

| Pressure (GPa)          | 0.0001(2) | 0.12(2)   | 0.40(2)  | 0.52(2)  | 0.80(2)  | 1.04(2)  |
|-------------------------|-----------|-----------|----------|----------|----------|----------|
| Distances[Å]            |           |           |          |          |          |          |
| O-H...O <sup>4465</sup> | 2.718(2)  | 2.719(14) | 2.687(4) | 2.671(8) | 2.662(4) | 2.637(5) |
| O-H...O <sup>3655</sup> | 2.720(3)  | 2.703(13) | 2.692(4) | 2.706(8) | 2.664(4) | 2.639(4) |

**Table S5.** Geometry of O···O contacts in Res·CH<sub>3</sub>OH.

| Pressure (GPa)          | 0.49(2)   | 0.70(2)    |
|-------------------------|-----------|------------|
| Distances[Å]            |           |            |
| O-H···O <sup>1555</sup> | 2.770 (2) | 2.744(4)   |
| O-H···O <sup>1545</sup> | 2.723 (3) | 2.706 (10) |
| O-H···O <sup>4745</sup> | 2.708 (2) | 2.686 (5)  |

**Table S6.** Geometry of O···O contacts in 3Res·2H<sub>2</sub>O.

| Pressure (GPa)          | 0.55(2)   | 0.83(2)    | 0.93(2)   |
|-------------------------|-----------|------------|-----------|
| Distances[Å]            |           |            |           |
| O-H···O <sup>1555</sup> | 2.695(1)  | 2.668 (4)  | 2.660 (4) |
| O-H···O <sup>1565</sup> | 2.761 (4) | 2.746 (10) | 2.733 (5) |
| O-H···O <sup>3455</sup> | 2.824 (2) | 2.791 (15) | 2.826 (4) |
| O-H···O <sup>4656</sup> | 2.761 (6) | 2.746 (12) | 2.733 (3) |

**Table S7.** Geometry of O···O contacts in Res·H<sub>2</sub>O.

| Pressure (GPa)          | 0.80(2)    |
|-------------------------|------------|
| Distances[Å]            |            |
| O-H···O <sup>1555</sup> | 2.713(2)   |
| O-H···O <sup>2664</sup> | 2.993 (10) |
| O-H···O <sup>4746</sup> | 2.763 (2)  |
| O-H···O <sup>4752</sup> | 2.742 (6)  |

**Table S8.** Hydrogen-bond angles C-O···O in Res·CH<sub>3</sub>OH, Res·H<sub>2</sub>O and 3Res·2H<sub>2</sub>O.

| Pressure (GPa) | Res·CH <sub>3</sub> OH |            | Res·H <sub>2</sub> O | 3Res·2H <sub>2</sub> O |            |            |
|----------------|------------------------|------------|----------------------|------------------------|------------|------------|
|                | 0.49(2)                | 0.70(2)    | 0.80(2)              | 0.55(2)                | 0.83(2)    | 0.93(2)    |
| Angle [°]      |                        |            |                      |                        |            |            |
| R-O3···O       | 115.61 (2)             | 115.33 (4) | 113.77 (1)           | 117.37 (4)             | 117.21 (4) | 117.36 (3) |
| O3···O-R       | 96.21 (3)              | 96.12 (5)  | 113.44 (4)           | 118.65 (3)             | 118.74 (3) | 118.87 (6) |
| R-O1···O       | 116.61 (1)             | 116.56 (2) | 113.70 (5)           | 117.78 (5)             | 117.20 (2) | 121.95 (5) |
| O1···O-R       | 106.84 (3)             | 106.69 (4) | 120.44 (6)           | 118.97 (1)             | 119.05 (2) | 120.27 (4) |

**Table S9.** ORTEP symmetry code.<sup>1</sup>

| Compound                    | ORTEP code | Symmetry code                                  |
|-----------------------------|------------|------------------------------------------------|
| $\alpha$ - resorcinol       | 3655       | $\frac{3}{2-x}, \frac{1}{2+y}, \frac{1}{2+z}$  |
|                             | 4465       | $-\frac{1}{2+x}, \frac{3}{2-y}, \frac{1}{2+z}$ |
| $\beta$ - resorcinol        | 2665       | $1-x, 1-y, \frac{1}{2+z}$                      |
|                             | 3655       | $\frac{3}{2-x}, \frac{1}{2+y}, \frac{1}{2+z}$  |
| $C_6H_4(OH)_2 \cdot H_2O$   | 2664       | $\frac{3}{2-x}, 1-y, -\frac{1}{2+z}$           |
|                             | 4746       | $2-x, -\frac{1}{2+y}, \frac{3}{2-z}$           |
|                             | 4756       | $2-x, \frac{1}{2+y}, \frac{3}{2-z}$            |
| $3C_6H_4(OH)_2 \cdot 2H_2O$ | 1565       | $+x, 1+y, z$                                   |

**Reference**

- (1) Johnson, C. K. ORTEPII. report ORNL-5138, TN: Oak Ridge National Laboratory, Memphis, 1976,
